# Supplementary material for: K+-Dependent Photocycle and Photocurrent Reveal the Uptake of K+ in Light-Driven Sodium Pump
Source: MDPI journal article supplement (doi:10.3390/ijms241914414), 2023-09-22
Supplement: s1 [file s1]

## Supplementary materials

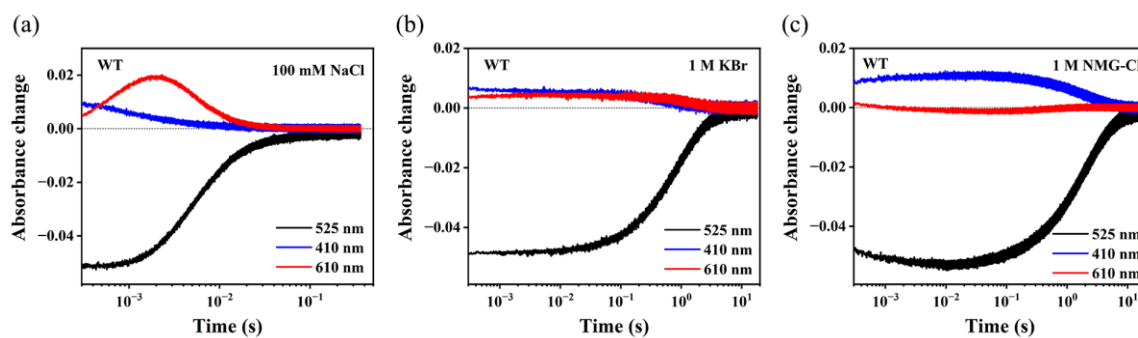

**Figure S1.** Photocycle kinetics of WT Ndr2 at pH 8.0. Absorbance changes of the WT in 0.05% DDM solution containing (a) 100 mM NaCl, (b) 1 M KBr, and (c) 1 M NMG-Cl are shown at characteristic wavelengths of 525 nm, 410 nm, and 610 nm.

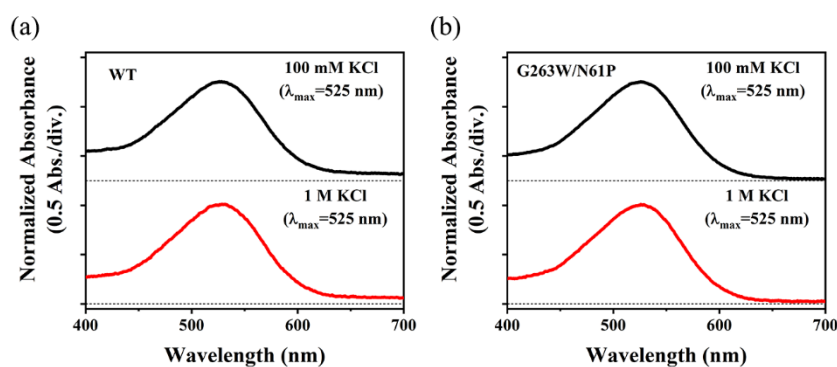

**Figure S2.** Characteristic absorption spectra of Ndr2 at pH 8.0. (a) the WT and (b) G263W/N61P are in 100 mM and 1 M KCl solution, respectively.

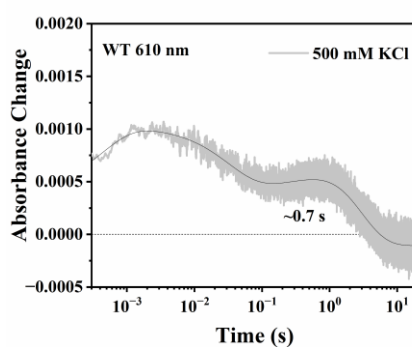

**Figure S3.** O intermediate kinetics of Ndr2 at pH 8.0. Absorbance changes of the WT in 500 mM KCl solution containing 0.05% DDM, were measured at 610 nm. The fitting line is superimposed on the raw data. The time constant of the rise of the O intermediate is indicated.

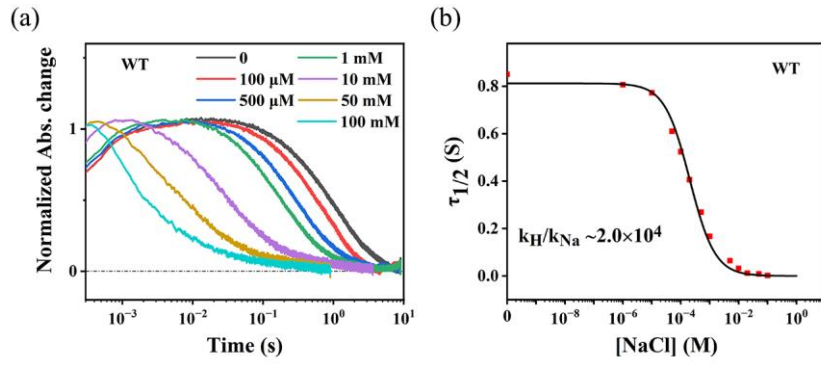

**Figure S4.** Kinetic analysis of competitive uptake of  $\text{Na}^+$  and  $\text{H}^+$  during M decay of WT NdR2 at pH 8.0. The WT in 1M NMG-Cl solution was titrated with 4 M NaCl. (a) Normalized absorbance changes at various concentrations of NaCl detected at 410 nm. (b) The  $\tau_{1/2}$  of M intermediate against NaCl concentrations (0-100 mM). The solid curve represents the fitting result corresponding to Equation 2. The calculated value of  $k_{\text{H}}/k_{\text{Na}}$  is shown accordingly.

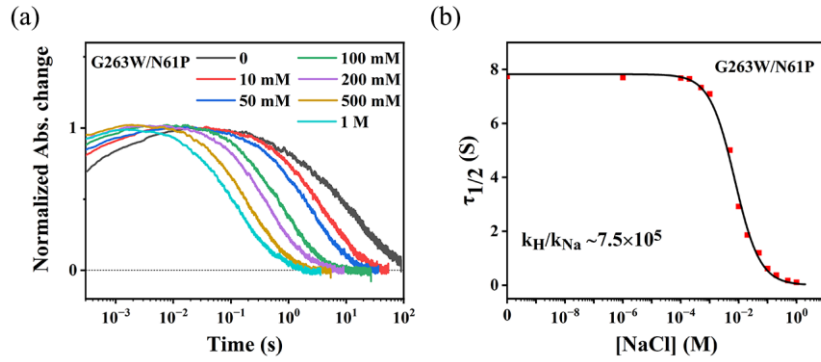

**Figure S5.** Kinetic analysis of competitive uptake of  $\text{Na}^+$  and  $\text{H}^+$  during M decay of G263W/N61P at pH 8.0. The mutant in the background salt solution of 50 mM NMG-Cl was titrated with 4 M NaCl. (a) Normalized absorbance changes at various concentrations of NaCl were obtained. (b) Calculated  $\tau_{1/2}$  of M intermediate was plotted against NaCl concentrations. The solid curve represents the fitting result corresponding to Equation 2. The calculated value of  $k_{\text{H}}/k_{\text{Na}}$  is shown accordingly.

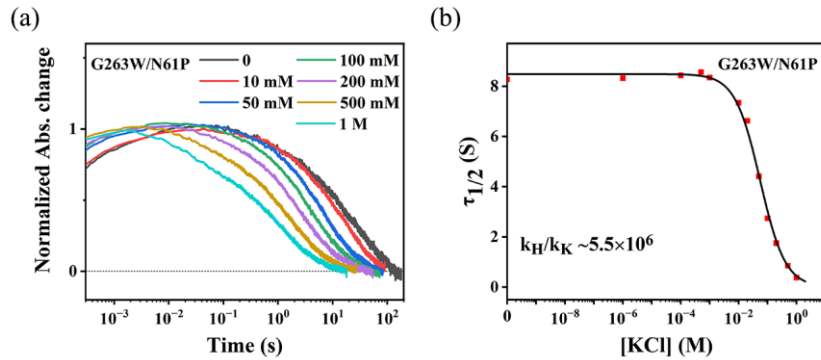

**Figure S6.** Kinetic analysis of competitive uptake of  $\text{K}^+$  and  $\text{H}^+$  during M decay of G263W/N61P at pH 8.0. The mutant in the background salt solution of 50 mM NMG-Cl was titrated with 3 M KCl. (a) Normalized absorbance changes at various concentrations of KCl were obtained. (b) Calculated  $\tau_{1/2}$  of M intermediate was plotted against KCl concentrations. The solid curve represents the fitting result corresponding to Equation 2. The calculated value of  $k_{\text{H}}/k_{\text{K}}$  is shown accordingly.

|                                     |                                                      |     |
|-------------------------------------|------------------------------------------------------|-----|
| Halobacterium salinarum NRC-1 (BR)  | -MLELLPFAVEGV-----QAQITGRPEWILALCTALMGLGLTYFLVKG     | 44  |
| Dokdonia eikasta (KR2)              | MTDELGNANFENFIGATEGFSEIAYQFTSHILTLGYAVMLAGLLYFILT-   | 49  |
| Nonlabens dokdonensis DSW-6 (NdR2)  | MIQDLGNSNFENYVGATDGFSEMAYQMTSHVLTGLYAVMFAGLLYFILT-   | 49  |
| Indibacter alkaliphilus LW1 (IaNaR) | -MENLGNATFENYIGLDGFNEMAYQMVAVLTLGYAVMLAGLFYFVLT-     | 48  |
| Dokdonia sp. PRO95                  | MTQELGNANFENFIGATEGFSEIAYQFTSHILTLGYAVMLAGLLYFILT-   | 49  |
| Gillisia limnaea (GLR)              | MTQELGNANFENFIGATEGFSEIAYQFTSHILTLGYAVMLAGLLYFILT-   | 49  |
| Nonlabens marinus S1-08 (NM-R2)     | -MQQLGNSNFENYIGASEGFSEMAYQMTSHVLTGLYAVMLAGLLYFILT-   | 48  |
| Jannaschia seosinensis (JsNaR)      | -----MPNYENFF-----AFEYQYEVVRHMFATAAVFPAAFVYFALT-     | 39  |
| Halobacterium salinarum NRC-1 (BR)  | MGVSDPDAKKFYAITTLVPAIAFTMYLSMLLGYGLTMVP-----FGGE     | 87  |
| Dokdonia eikasta (KR2)              | IKNVDDKKFOMENILSAVVMVSAFLLLYAQAGNWTSSFTFNEEVGRYFLDP  | 99  |
| Nonlabens dokdonensis DSW-6 (NdR2)  | IKNVDDKKYRMSNILSAVVMVSAALLLYAQAGNWTESFAFPAERGRKYFLVE | 99  |
| Indibacter alkaliphilus LW1 (IaNaR) | IKTVAPRPFRTSSVLSSVVMVSAFLLLYVQASNWTESFFVPTDERGKYFLGE | 98  |
| Dokdonia sp. PRO95                  | IKNVDDKKFOMENILSAVVMVSAFLLLYAQAGNWTSSFTFNEEVGRYFLDP  | 99  |
| Gillisia limnaea (GLR)              | IKKVDDKKYOMENILSAVVMVSAFLLLYAQAGNWTSSFTFDISGRKYFLEP  | 99  |
| Nonlabens marinus S1-08 (NM-R2)     | IKKVDDKKFOMENILSAVVMVSAFLLLYAQAGNWTSSFTFDIELGRYFLDP  | 98  |
| Jannaschia seosinensis (JsNa)       | MROVAERYRLASIIICVVMISATLELFLWLMMNRAFEFDITMTYARAE     | 89  |
| Halobacterium salinarum NRC-1 (BR)  | QNPITYWA--RYADWLFTTPLLDDLALLVDADQGITLALVG----ADGIM   | 131 |
| Dokdonia eikasta (KR2)              | SGDLFNNGYRYLNLWIDVPMLLFQILFVVSLTTSKFSVVRNQFWFSGAMM   | 149 |
| Nonlabens dokdonensis DSW-6 (NdR2)  | GGDLFNNGYRYLNLWIDVPMLLFQILFVVQLTKSKLSSVRNQFWFSGAMM   | 149 |
| Indibacter alkaliphilus LW1 (IaNaR) | GNDLFNNGYRYLNLWIDVPMLLFQILFVVSLTTSKFSVVRNQFWISGTGM   | 148 |
| Dokdonia sp. PRO95                  | SGDLFNNGYRYLNLWIDVPMLLFQILFVVSLTTSKFSVVRNQFWFSGAMM   | 149 |
| Gillisia limnaea (GLR)              | NGDLFNNGYRYLNLWIDVPMLLFQILFVVSLTTSKFSVVRNQFWFSGAMM   | 149 |
| Nonlabens marinus S1-08 (NM-R2)     | DGDLFNNGYRYLNLWIDVPMLLFQILFVVSLTTSKLSIRNQFWFSGTMM    | 148 |
| Jannaschia seosinensis (JsNaR)      | G-FIFANGYRYANWMIDVPMMLTOLLVVLGFAGRDMLSRWWKLMALGVFM   | 138 |
| Halobacterium salinarum NRC-1 (BR)  | IGTGLVGALTKVYSYR-----FVWVAISTAAMLYILYVLFVFGFTSK      | 172 |
| Dokdonia eikasta (KR2)              | IITGYIGQFYEVSNL-----TAFVLVWGAISSAFFPHILWVMKKVINEG    | 192 |
| Nonlabens dokdonensis DSW-6 (NdR2)  | IITGYIGQYVEVTDL-----SAFFIWGAISTVFFPHILWLMNKVKEG      | 192 |
| Indibacter alkaliphilus LW1 (IaNaR) | IVTGYIGQFYEVTDL-----TMFAIWGAISTVFFPHILWLMKKVIDEG     | 191 |
| Dokdonia sp. PRO95                  | IITGYIGQFYEVSNL-----TAFVLVWGAISSAFFPHILWVMKKVINEG    | 192 |
| Gillisia limnaea (GLR)              | IITGYIGQFYEVSNL-----TAFVLVWGAISSAFFPHILWVMKKVINEG    | 192 |
| Nonlabens marinus S1-08 (NM-R2)     | IITGYIGQFYEVSDI-----TWFLIWGAISTVFFPHILYLMKKVINEG     | 191 |
| Jannaschia seosinensis (JsNaR)      | ILTAYIGQYVEPQAAGIIDEAFGFVFWGIVSWIAFLVLLWLLYKNVEEG    | 188 |
| Halobacterium salinarum NRC-1 (BR)  | AESMRPEVASIFKVLNRNVTVLWSAYPVVWLIGSEG-----AGIVPLNI    | 216 |
| Dokdonia eikasta (KR2)              | KEGISPAQOKILSNIWILFLISWTLYPGAYLMPYLTGVDGFLYSESGVMA   | 242 |
| Nonlabens dokdonensis DSW-6 (NdR2)  | KVGIPKKGOKILSNIWILFLVSWFLYPGAYLMPHLGGIEGFLFNESGVVG   | 242 |
| Indibacter alkaliphilus LW1 (IaNaR) | KDGIAPAKAQETLQSIWVFLVSWMLYPGAYLMPHLAGIEGLFFSEIGVVA   | 241 |
| Dokdonia sp. PRO95                  | KEGISPAQOKILSNIWILFLISWTLYPGAYLMPYLTGVDGFLYSESGVMA   | 242 |
| Gillisia limnaea (GLR)              | KEGLSADAOKILSNIWVFLVSWFLYPGAYLMPYLTGLDGGFFSESGVMA    | 242 |
| Nonlabens marinus S1-08 (NM-R2)     | KEGISSTKQOKILSNIWILFLISWFLYPGAYLMPYLGGDIDGFLYNESGVVG | 241 |
| Jannaschia seosinensis (JsNa)       | RARMGGEASKLMGAAWTLMWITWTIYGLVYLVPGLPGIN---ESTWIVI    | 235 |
| Halobacterium salinarum NRC-1 (BR)  | ETLLFMVLDVSAKVGFGLILLRSRAIFGEAEAPSPSAGDGAAATSD       | 262 |
| Dokdonia eikasta (KR2)              | ROLVYTTIADVSSKVIYGVLLGNLAILSKNKELVEANS-----          | 280 |
| Nonlabens dokdonensis DSW-6 (NdR2)  | RQITYTTIADVCSKVIYGVLLGNLALVLSKNKEMIETA-----          | 279 |
| Indibacter alkaliphilus LW1 (IaNaR) | RQITYTTIADVSSKVIYGILLTNVAQVMSKEEGYLEHTT-----         | 279 |
| Dokdonia sp. PRO95                  | ROLVYTTIADVCSKVIYGVLLGNLAILSKNKELVEANS-----          | 280 |
| Gillisia limnaea (GLR)              | ROLTYTTIADVCSKVIYGVLLGNLALKLSNNKEMVELSN-----         | 280 |
| Nonlabens marinus S1-08 (NM-R2)     | RQITYTTIADVCSKVIYGVLLGNLAMLSTKNKNEHKPA-----          | 279 |
| Jannaschia seosinensis (JsNaR)      | ROGGYTFADVTSKAVFGVILSYTAMTLSKEPERNTTRKAA-----        | 275 |

**Figure S7.** Sequence alignment of amino acids of BR, KR2, NdR2, IaNaR, Dokdonia sp. PRO95, GLR, NMR2, and JaNaR. The sequences were aligned using the ClustalW algorithm implemented in the Mega X software.
